# Supplementary material for: Systemic Immune Inflammation Index (SII), System Inflammation Response Index (SIRI) and Risk of All-Cause Mortality and Cardiovascular Mortality: A 20-Year Follow-Up Cohort Study of 42,875 US Adults
Source: MDPI journal article supplement (doi:10.3390/jcm12031128), 2023-01-31
Supplement: s1 [file s1]

**Table S1.** Baseline characteristics of the general adult population included in NHANES 1999–2018.

| Variables                              | Total ( <i>n</i> = 42,875) |
|----------------------------------------|----------------------------|
| Age, years                             | 44 (18)                    |
| Male, %                                | 4010 (47.8)                |
| Race/ethnicity, %                      |                            |
| Mexican American                       | 8578 (20.0)                |
| Other Hispanic                         | 3727 (8.7)                 |
| Non-Hispanic White                     | 17,029 (39.7)              |
| Non-Hispanic Black                     | 9287 (21.7)                |
| Other race                             | 4254 (9.9)                 |
| Education level, %                     |                            |
| Below high school                      | 11,715 (27.3)              |
| High school                            | 9633 (22.5)                |
| Above high school                      | 21,527 (50.2)              |
| Poverty, %                             | 9243 (21.6)                |
| Smoking status, %                      |                            |
| Never smokers                          | 24,908 (58.1)              |
| Former smokers                         | 8696 (20.3)                |
| Current smokers                        | 9271 (21.6)                |
| Drinking status, %                     |                            |
| Nondrinkers                            | 9554 (22.3)                |
| Low-to-moderate drinkers               | 30,005 (70.0)              |
| Heavy drinkers                         | 3316 (7.7)                 |
| BMI status, %                          |                            |
| <25.0                                  | 13,872 (32.4)              |
| 25.0–29.9                              | 14,087 (32.9)              |
| >29.9                                  | 14,916 (34.8)              |
| Physical activity, %                   |                            |
| Inactive                               | 10,511 (24.5)              |
| Insufficiently active                  | 16,057 (37.5)              |
| Active                                 | 16,307 (38.0)              |
| Energy intake, kcal/day                | 1961.00 [1475.00, 2574.18] |
| eGFR, ml/min/1.73 m <sup>2</sup>       | 100.05 (23.28)             |
| ALT, U/L                               | 21.00 [16.00, 28.00]       |
| AST, U/L                               | 22.00 [19.00, 27.00]       |
| Hypertension, %                        | 11,594 (27.0)              |
| Diabetes, %                            | 3776 (8.8)                 |
| WBC count, 10 <sup>3</sup> /μL         | 6.90 [5.70, 8.40]          |
| Neutrophils count, 10 <sup>3</sup> /μL | 4.00 [3.10, 5.10]          |
| Monocyte count, 10 <sup>3</sup> /μL    | 0.50 [0.40, 0.60]          |
| Lymphocyte count, 10 <sup>3</sup> /μL  | 2.10 [1.70, 2.60]          |
| Platelet count, 10 <sup>3</sup> /μL    | 248.00 [211.00, 293.00]    |
| SII                                    | 468.84 [335.37, 655.56]    |
| SIRI                                   | 0.99 [0.68, 1.43]          |

Normally distributed continuous variables are described as means and SD, and continuous variables without a normal distribution are presented as medians [interquartile ranges]. Categorical variables are presented as numbers (percentages). eGFR, estimated glomerular filtration rate; ALT, alanine aminotransferase; AST, aspartate aminotransferase; WBC, white blood cell; SII, systemic immune-inflammatory index; SIRI, systemic inflammatory response index.

**Table S2.** Hazard ratios of cardiovascular diseases and all-cause mortality according to quantiles of SII and SIRI stratified by gender.

|                          | Cardiovascular mortality    |                           | All-cause mortality         |                           |
|--------------------------|-----------------------------|---------------------------|-----------------------------|---------------------------|
|                          | Female ( <i>n</i> = 21,792) | Male ( <i>n</i> = 21,083) | Female ( <i>n</i> = 21,792) | Male ( <i>n</i> = 21,083) |
| <b>SII</b>               |                             |                           |                             |                           |
| Q1 (<335.36)             | Reference                   | Reference                 | Reference                   | Reference                 |
| Q2 (355.36–468.83)       | 1.03 (0.78–1.37)            | 1.13 (0.87–1.47)          | 0.97 (0.84–1.12)            | 1.01 (0.89–1.14)          |
| Q3 (468.84–655.55)       | 1.12 (0.85–1.49)            | 1.21 (0.93–1.57)          | 1.03 (0.89–1.18)            | 1.04 (0.91–1.17)          |
| Q4 (>655.56)             | 1.38 (1.06–1.81)            | 1.30 (1.01–1.67)          | 1.33 (1.17–1.52)            | 1.26 (1.12–1.42)          |
| <i>p</i> for trend       | 0.047                       | 0.227                     | <0.001                      | <0.001                    |
| <i>p</i> for interaction | 0.756                       |                           | 0.722                       |                           |
| <b>SIRI</b>              |                             |                           |                             |                           |
| Q1 (<0.68)               | Reference                   | Reference                 | Reference                   | Reference                 |
| Q2 (0.68–0.98)           | 0.84 (0.64–1.12)            | 0.93 (0.67–1.28)          | 0.96 (0.84–1.10)            | 1.02 (0.88–1.19)          |
| Q3 (0.99–1.42)           | 1.08 (0.82–1.42)            | 1.13 (0.84–1.53)          | 1.13 (0.99–1.30)            | 1.18 (1.03–1.36)          |
| Q4 (>1.43)               | 1.32 (1.01–1.72)            | 1.46 (1.10–1.94)          | 1.40 (1.23–1.60)            | 1.38 (1.21–1.58)          |
| <i>p</i> for trend       | 0.008                       | 0.002                     | <0.001                      | <0.001                    |
| <i>p</i> for interaction | 0.907                       |                           | 0.152                       |                           |

Data are presented as HR (95% CI) unless indicated otherwise. The multiple cox analysis was conducted by quantiles of SII or SIRI adjusted for age (continuous), race/ethnicity (Mexican American, Other Hispanic, Non-Hispanic White, Non-Hispanic Black or Other), education level (below high school, high school, or above high school), family poverty income ratio (<1.0, or ≥1.0), drinking status (nondrinkers, low-to-moderate drinkers, or heavy drinkers), smoking status (never smokers, former smokers, or current smokers), BMI (<25.0, 25.0–29.9, or >29.9), physical activity (inactive, insufficiently active, or active), total energy intakes (in quartiles), estimated glomerular filtration rate (continuous), alanine aminotransferase (in quartiles), aspartate aminotransferase (in quartiles), self-reported hypertension (yes or no), and self-reported diabetes (yes or no). CI, confidence interval; HR, hazard ratio; SII, systemic immune-inflammation index; SIRI, systemic inflammation response index.

**Table S3.** Hazard ratios of cardiovascular diseases and all-cause mortality according to quantiles of SII and SIRI stratified age.

|                          | Cardiovascular mortality     |                              | All-cause mortality          |                              |
|--------------------------|------------------------------|------------------------------|------------------------------|------------------------------|
|                          | Age <60 ( <i>n</i> = 32,474) | Age ≥60 ( <i>n</i> = 10,401) | Age <60 ( <i>n</i> = 32,474) | Age ≥60 ( <i>n</i> = 10,401) |
| <b>SII</b>               |                              |                              |                              |                              |
| Q1 (<335.36)             | Reference                    | Reference                    | Reference                    | Reference                    |
| Q2 (355.36–468.83)       | 1.01 (0.66–1.55)             | 1.08 (0.87–1.35)             | 0.87 (0.73–1.03)             | 1.03 (0.92–1.15)             |
| Q3 (468.84–655.55)       | 1.23 (0.82–1.85)             | 1.14 (0.92–1.41)             | 0.96 (0.81–1.14)             | 1.06 (0.95–1.18)             |
| Q4 (>655.56)             | 1.31 (0.88–1.95)             | 1.33 (1.08–1.64)             | 1.06 (0.90–1.25)             | 1.39 (1.26–1.54)             |
| <i>p</i> for trend       | 0.430                        | 0.039                        | 0.110                        | <0.001                       |
| <i>p</i> for interaction | 0.940                        |                              | 0.008                        |                              |
| <b>SIRI</b>              |                              |                              |                              |                              |
| Q1 (<0.68)               | Reference                    | Reference                    | Reference                    | Reference                    |
| Q2 (0.68–0.98)           | 0.75 (0.48–1.17)             | 0.96 (0.75–1.22)             | 0.84 (0.70–1.01)             | 1.11 (0.98–1.25)             |
| Q3 (0.99–1.42)           | 0.99 (0.66–1.50)             | 1.18 (0.93–1.49)             | 1.11 (0.94–1.31)             | 1.24 (1.10–1.40)             |
| Q4 (>1.43)               | 1.39 (0.95–2.04)             | 1.56 (1.24–1.95)             | 1.12 (0.94–1.32)             | 1.66 (1.48–1.86)             |
| <i>p</i> for trend       | 0.022                        | <0.001                       | 0.005                        | <0.001                       |
| <i>p</i> for interaction | 0.528                        |                              | 0.003                        |                              |

Data are presented as HR (95% CI) unless indicated otherwise. The multiple cox analysis was conducted by quantiles of SII or SIRI adjusted for sex (male or female), race/ethnicity (Mexican American, Other Hispanic, Non-Hispanic White, Non-Hispanic Black or Other), education level (below high school, high school, or above high school), family poverty income ratio (<1.0, or ≥1.0), drinking status (nondrinkers, low-to-moderate drinkers, or heavy drinkers), smoking status (never smokers, former smokers, or current smokers), BMI (<25.0, 25.0–29.9, or >29.9), physical activity (inactive, insufficiently active, or active), total energy intakes (in quartiles), estimated glomerular filtration

rate (continuous), alanine aminotransferase (in quartiles), aspartate aminotransferase (in quartiles), self-reported hypertension (yes or no), and self-reported diabetes (yes or no). CI, confidence interval; HR, hazard ratio; SII, systemic immune-inflammation index; SIRI, systemic inflammation response index.

**Table S4.** Hazard ratios of cardiovascular diseases and all-cause mortality after excluding events occurred at the first two years of the follow-up.

|                    | Cardiovascular mortality | All-cause mortality |
|--------------------|--------------------------|---------------------|
|                    | HR (95%CI)               | HR (95%CI)          |
| SII                |                          |                     |
| Q1 (<335.25)       | Reference                | Reference           |
| Q2 (335.25–468.40) | 1.10 (0.90–1.35)         | 1.01 (0.91–1.11)    |
| Q3 (468.41–654.25) | 1.18 (0.96–1.44)         | 1.05 (0.95–1.15)    |
| Q4 (>654.26)       | 1.33 (1.10–1.62)         | 1.28 (1.17–1.40)    |
| <i>p</i> for trend | 0.027                    | <0.001              |
| SIRI               |                          |                     |
| Q1 (<0.67)         | Reference                | Reference           |
| Q2 (0.67–0.97)     | 0.89 (0.71–1.11)         | 1.00 (0.90–1.11)    |
| Q3 (0.98–1.42)     | 1.13 (0.91–1.39)         | 1.17 (1.05–1.29)    |
| Q4 (>1.43)         | 1.40 (1.14–1.71)         | 1.37 (1.24–1.51)    |
| <i>p</i> for trend | <0.001                   | <0.001              |

Data are presented as HR (95% CI) unless indicated otherwise. The multiple cox analysis was conducted by quantiles of SII or SIRI adjusted for age (continuous), sex (male or female), race/ethnicity (Mexican American, Other Hispanic, Non-Hispanic White, Non-Hispanic Black or Other), education level (below high school, high school, or above high school), family poverty income ratio (<1.0, or ≥1.0), drinking status (nondrinkers, low-to-moderate drinkers, or heavy drinkers), smoking status (never smokers, former smokers, or current smokers), BMI (<25.0, 25.0–29.9, or >29.9), physical activity (inactive, insufficiently active, or active), total energy intakes (in quartiles), estimated glomerular filtration rate (continuous), alanine aminotransferase (in quartiles), aspartate aminotransferase (in quartiles), self-reported hypertension (yes or no), and self-reported diabetes (yes or no). CI, confidence interval; HR, hazard ratio; SII, systemic immune-inflammation index; SIRI, systemic inflammation response index.
